# Supplementary material
Source: PubMed Central journal article supplement (PMC10690578)

## Supplemental Online Content

Li Y, Yip M, Ning Y, et al. Topical Atropine for Childhood Myopia Control: The Atropine Treatment Long-Term Assessment Study. *JAMA Ophthalmol*. Published online November 30, 2023.  
doi:10.1001/jamaophthalmol.2023.5467

**eTable 1.** Follow-up Rates of the ATOM Studies

**eTable 2.** Comparison between the Study Participants and the Residual Participants

**eTable 3.** Demographics and Characteristics of ATOM2 Study Participants Classified by Myopia Progression from the Final Trial Visit to the Current Study Visit

**eFigure 1.** Box plots showing the change of mean spherical equivalent (SE) and axial length (AL) from baseline of ATOM1 study participants

**eFigure 2.** Box plots showing the change of mean spherical equivalent (SE) and axial length (AL) from baseline of ATOM2 study participants

**eFigure 3.** Line chart showing the change of mean spherical equivalent (SE) and axial length (AL) of ATOM2 study participants over time. Error bars show the standard errors of the means

This supplemental material has been provided by the authors to give readers additional information about their work.

## eResults.

The authors have provided these eResults to provide readers additional information about the work.

**eTable 1. Follow-up Rates of the ATOM Studies**

|          | <b>ATOM1</b>                                                                                                                                                                                    | <b>ATOM2</b>                                                                                                                                                                                     |
|----------|-------------------------------------------------------------------------------------------------------------------------------------------------------------------------------------------------|--------------------------------------------------------------------------------------------------------------------------------------------------------------------------------------------------|
| Baseline | n = 400                                                                                                                                                                                         | n = 400                                                                                                                                                                                          |
| 2 year   | n = 348 (87.0%)                                                                                                                                                                                 | n = 355 (88.8%)                                                                                                                                                                                  |
| 3 year   | n = 333 (83.3%)                                                                                                                                                                                 | n = 345 (86.3%)                                                                                                                                                                                  |
| 5 year   | NA                                                                                                                                                                                              | n = 328 (82.0%)                                                                                                                                                                                  |
| Current  | <ul style="list-style-type: none"><li>• Contactable (n = 159, 39.8%)<ul style="list-style-type: none"><li>○ Rejected (n = 88, 22.0%)</li><li>○ Participated (n = 71, 17.8%)</li></ul></li></ul> | <ul style="list-style-type: none"><li>• Contactable (n = 255, 63.8%)<ul style="list-style-type: none"><li>○ Rejected (n = 97, 24.3%)</li><li>○ Participated (n = 158, 39.5%)</li></ul></li></ul> |

ATOM = atropine for the treatment of myopia.

**eTable 2. Comparison between the Study Participants and the Residual Participants**

|                                | ATOM1                               |                                       |            | ATOM2                                                  |                                                        |            |
|--------------------------------|-------------------------------------|---------------------------------------|------------|--------------------------------------------------------|--------------------------------------------------------|------------|
|                                | Study Subject<br>(n = 71)           | Residual<br>(n = 329)                 | P<br>Value | Study Subject<br>(n = 158)                             | Residual<br>(n = 242)                                  | P<br>Value |
| Baseline age, mean (SD), years | 8.9 (1.4)                           | 9.3 (1.6)                             | .07        | 9.5 (1.5)                                              | 9.9 (1.6)                                              | .01        |
| Gender, n (% of female)        | 33 (46.5)                           | 148 (45.0)                            | .92        | 76 (48.1)                                              | 113 (46.7)                                             | .70        |
| Race, n (% of Chinese)         | 71 (100.0)                          | 305 (92.7)                            | .14        | 144 (91.1)                                             | 220 (90.9)                                             | .91        |
| Atropine groups, n (%)         | 1%: 39 (54.9)<br>Placebo: 32 (45.1) | 1%: 161 (48.9)<br>Placebo: 168 (51.1) | .43        | 0.01%: 31 (19.6)<br>0.1%: 62 (39.2)<br>0.5%: 65 (41.1) | 0.01%: 53 (21.9)<br>0.1%: 93 (38.4)<br>0.5%: 96 (39.7) | .44        |
| SE, mean (SD), D               |                                     |                                       |            |                                                        |                                                        |            |
| Baseline                       | -3.14 (1.24)                        | -3.31 (1.34)                          | .33        | -4.70 (1.65)                                           | -4.63 (1.56)                                           | .52        |
| Change of SE*                  | 1.62 (0.94)                         | 1.43 (0.82)                           | .10        | 1.79 (1.15)                                            | 1.82 (1.11)                                            | .81        |
| AL, mean (SD), mm              |                                     |                                       |            |                                                        |                                                        |            |
| Baseline                       | 24.78 (0.80)                        | 24.91 (0.85)                          | .23        | 25.08 (0.89)                                           | 25.22 (0.90)                                           | .03        |
| Change of AL*                  | 0.50 (0.49)                         | 0.47 (0.45)                           | .51        | 0.83 (0.51)                                            | 0.84 (0.50)                                            | .71        |

ATOM = atropine for the treatment of myopia; SD = standard deviation; SE = spherical equivalent; D = diopters; AL = axial length

\*Change of SE/AL: change from baseline visit to final trial visit.

**eTable 3. Demographics and Characteristics of ATOM2 Study Participants Classified by Myopia Progression from the Final Trial Visit to the Current Study Visit**

|                                    | <b>Eyes progressed &lt; 1.0 D (n = 202)</b> | <b>Eyes progressed ≥ 1.0 D (n = 94)</b> | <b>Mean Difference (95% Confidence Interval)</b> | <b>P Value</b> |
|------------------------------------|---------------------------------------------|-----------------------------------------|--------------------------------------------------|----------------|
| Baseline age, mean (SD), years     | 9.7 (1.4)                                   | 9.3 (1.5)                               | 0.5 (0.1 to 0.8)                                 | .01            |
| Study age, mean (SD), years        | 24.5 (1.4)                                  | 23.9 (1.5)                              | 0.6 (0.2 to 0.9)                                 | .002           |
| Gender, n (% of female)            | 97 (48.0)                                   | 57 (60.6)                               | NA                                               | .06            |
| Race, n (% of Chinese)             | 181 (89.6)                                  | 87 (92.6)                               | NA                                               | .46            |
| <b>Atropine treatment, n (%)</b>   |                                             |                                         |                                                  |                |
| 0.01%                              | 45 (22.3)                                   | 11 (11.7)                               | NA                                               | .03            |
| 0.1%                               | 79 (39.1)                                   | 43 (45.7)                               |                                                  |                |
| 0.5%                               | 78 (38.6)                                   | 40 (42.6)                               |                                                  |                |
| Re-treatment, n (%)                | 110 (54.5)                                  | 64 (68.1)                               | NA                                               | .03            |
| <b>SE, mean (SD), D</b>            |                                             |                                         |                                                  |                |
| Baseline                           | -4.52 (1.52)                                | -4.60 (1.89)                            | 0.08 (-0.36 to 0.52)                             | .72            |
| 2 year                             | -4.80 (1.45)                                | -5.05 (1.83)                            | 0.24 (-0.18 to 0.67)                             | .26            |
| 5 year                             | -6.14 (1.81)                                | -6.81 (2.35)                            | 0.68 (0.13 to 1.22)                              | .01            |
| Current                            | -6.20 (1.92)                                | -8.36 (2.66)                            | 2.16 (1.56 to 2.77)                              | <.001          |
| <b>Change of SE, mean (SD), D</b>  |                                             |                                         |                                                  |                |
| Baseline to 2 year                 | -0.29 (0.55)                                | -0.45 (0.66)                            | 0.16 (-0.00 to 0.33)                             | .05            |
| Baseline to 5 year                 | -1.62 (1.02)                                | -2.21 (1.33)                            | 0.59 (0.29 to 0.90)                              | <.001          |
| 5 year to current                  | -0.06 (0.54)                                | -1.55 (0.64)                            | 1.49 (1.34 to 1.64)                              | <.001          |
| Baseline to current                | -1.68 (1.22)                                | -3.76 (1.63)                            | 2.08 (1.71 to 2.45)                              | <.001          |
| <b>AL, mean (SD), mm</b>           |                                             |                                         |                                                  |                |
| Baseline                           | 25.03 (0.89)                                | 25.17 (0.88)                            | -0.14 (-0.36 to 0.08)                            | .20            |
| 2 year                             | 25.28 (0.92)                                | 25.53 (0.89)                            | -0.25 (-0.47 to -0.03)                           | .03            |
| 5 year                             | 25.79 (0.99)                                | 26.21 (0.98)                            | -0.42 (-0.66 to -0.18)                           | .001           |
| Current                            | 25.99 (1.07)                                | 26.91 (1.20)                            | -0.92 (-1.20 to -0.63)                           | <.001          |
| <b>Change of AL, mean (SD), mm</b> |                                             |                                         |                                                  |                |
| Baseline to 2 year                 | 0.25 (0.25)                                 | 0.36 (0.31)                             | -0.11 (-0.19 to -0.03)                           | .02            |
| Baseline to 5 year                 | 0.76 (0.46)                                 | 1.04 (0.58)                             | -0.28 (-0.41 to -0.14)                           | <.001          |
| 5 year to current                  | 0.20 (0.29)                                 | 0.70 (0.44)                             | -0.50 (-0.60 to -0.40)                           | <.001          |
| Baseline to current                | 0.96 (0.59)                                 | 1.74 (0.84)                             | -0.78 (-0.97 to -0.59)                           | <.001          |

SD = standard deviation; SE = spherical equivalent; D = diopters; AL = axial length.

**eFigure 1. Box plots showing the change of mean spherical equivalent (SE) and axial length (AL) from baseline of ATOM1 study participants**

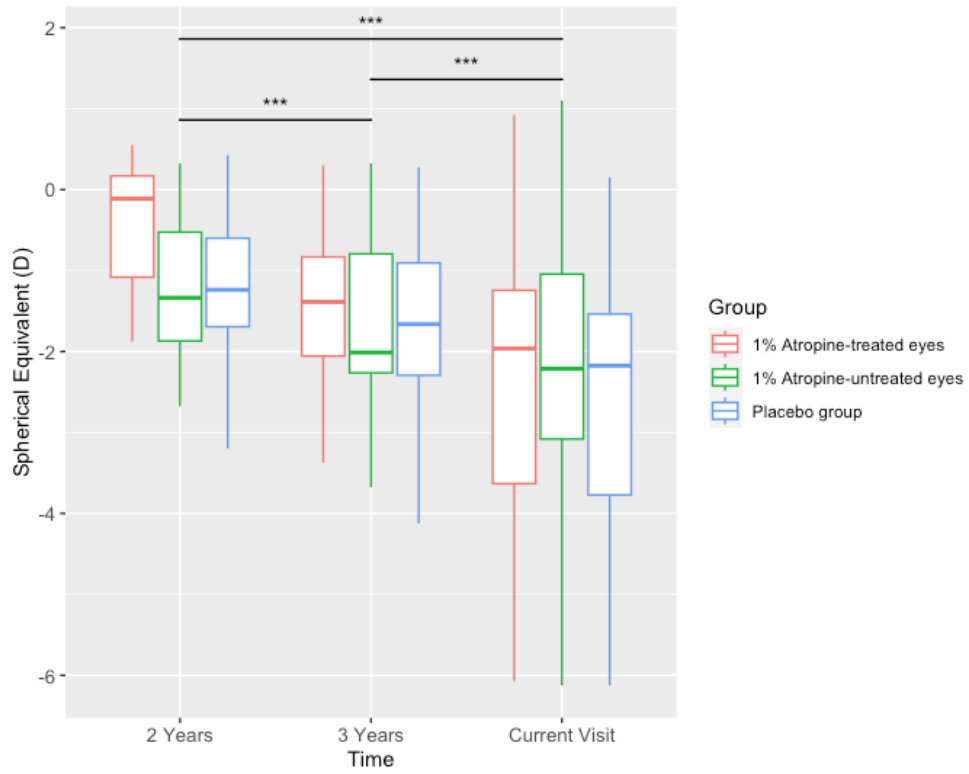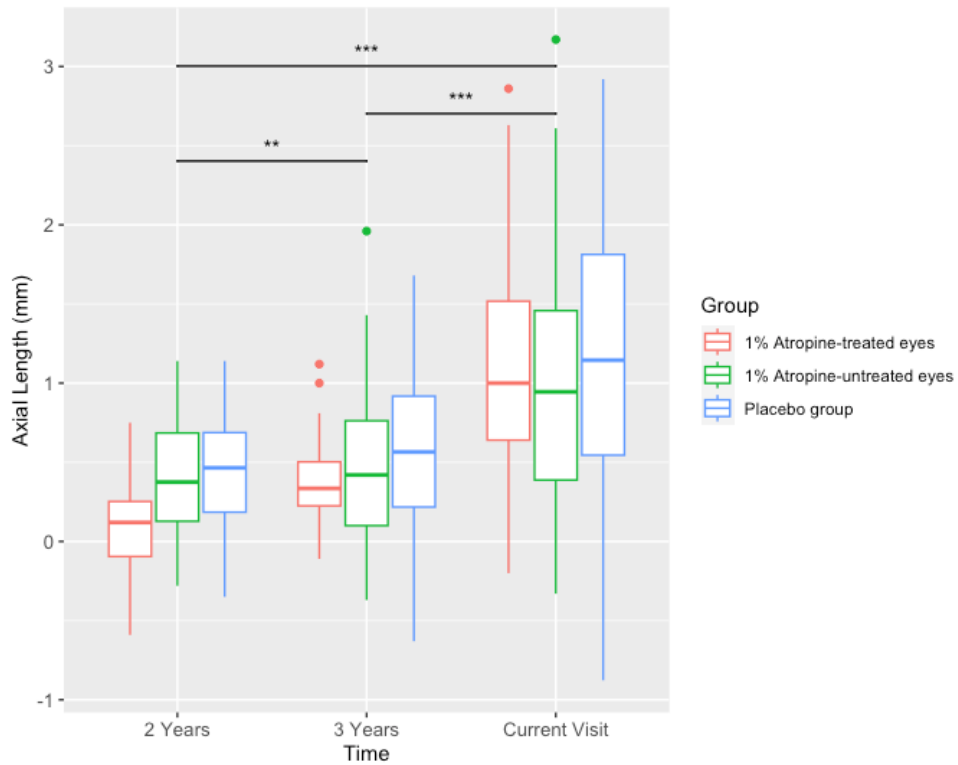

**eFigure 2. Box plots showing the change of mean spherical equivalent (SE) and axial length (AL) from Baseline of ATOM2 study participants**

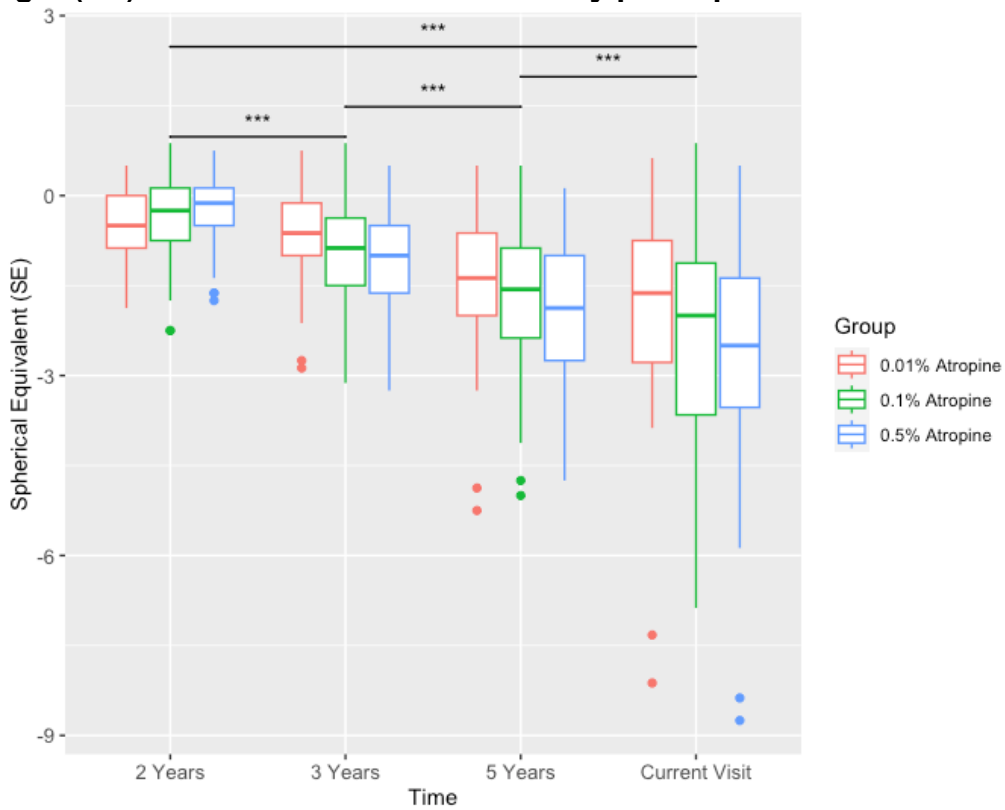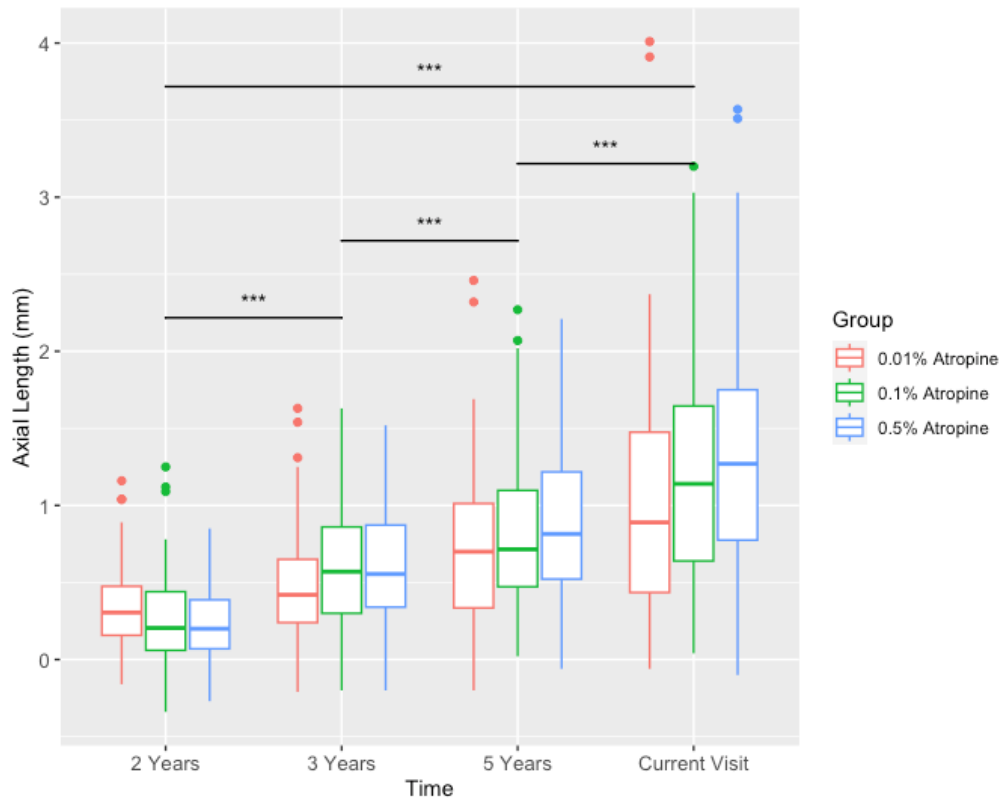

**eFigure 3. Line chart showing the change of mean spherical equivalent (SE) and axial length (AL) of ATOM2 study participants over time. Error bars show the standard errors of the means**

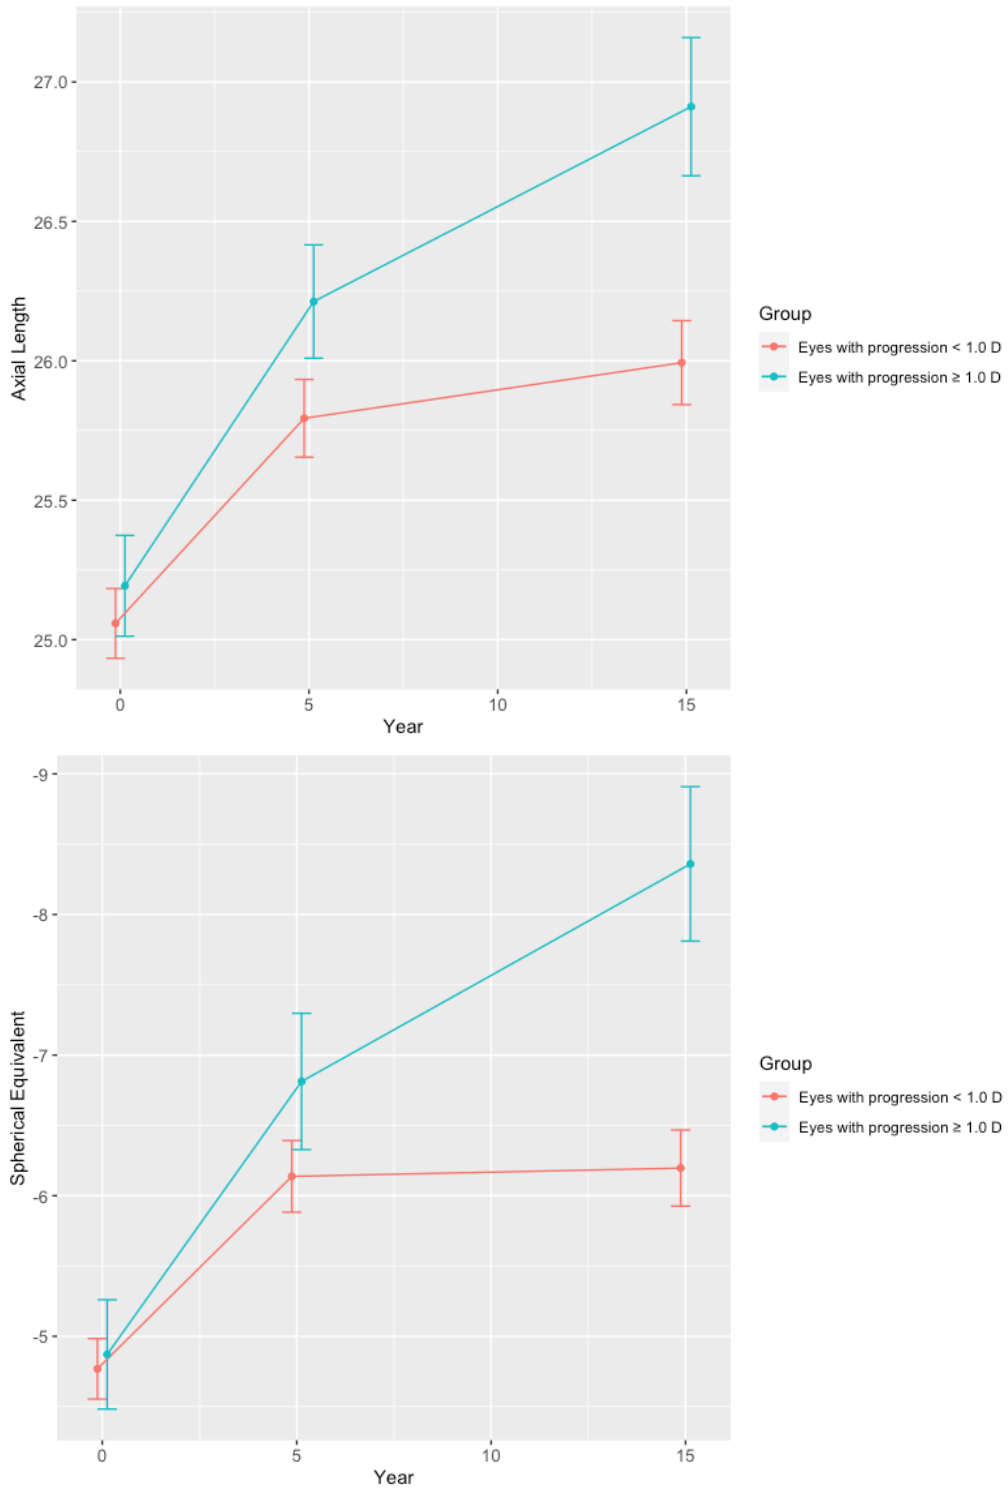

Supplement: jamaophthalmol-e235467-s001.pdf [file jamaophthalmol-e235467-s001.pdf]
