# Supplementary material
Source: PubMed Central journal article supplement (PMC10690578)
Supplement: jamaophthalmol-e235467-s002.pdf [file jamaophthalmol-e235467-s002.pdf]

## Data Sharing Statement

Li. Topical Atropine for Childhood Myopia Control. *JAMA Ophthalmol*. Published November 30, 2023. doi:10.1001/jamaophthalmol.2023.5467

### Data

**Data available:** No
